# Supplementary material
Source: publisher figshare collection journal article supplement (https://acs.figshare.com/ndownloader/files/5152642)
Supplement: Supplementary file 1 [file 5152642]

data_La4Ga2O9_publ

_pd_block_id
  2004-06-28T18:32|La4Ga2O9|M.A.G.Aranda|Overall

_audit_creation_method  "from EXP file using GSAS2CIF"
_audit_creation_date                   2004-06-28T18:32
_audit_author_name                     M.A.G.Aranda
_audit_update_record
; 2004-06-28T18:32  Initial CIF as created by GSAS2CIF
;

#=============================================================================
# this information describes the project, paper etc. for the CIF             #
# Acta Cryst. Section C papers and editorial correspondence is generated     #
# from the information in this section                                       #
#                                                                            #
#   (from)   CIF submission form for Rietveld refinements (Acta Cryst. C)    #
#                                                 Version 14 December 1998   #
#=============================================================================
# 1. SUBMISSION DETAILS

_publ_contact_author_name            ?   # M.A.G.Aranda
_publ_contact_author_address             # University of Malaga
; ?
;
_publ_contact_author_email           ?
_publ_contact_author_fax             ?
_publ_contact_author_phone           ?

_publ_contact_letter
; ?
;

_publ_requested_journal              ?
_publ_requested_coeditor_name        ?
_publ_requested_category             ?   # Acta C: one of CI/CM/CO/FI/FM/FO

#==============================================================================

# 2. PROCESSING SUMMARY (IUCr Office Use Only)

_journal_data_validation_number      ?

_journal_date_recd_electronic        ?
_journal_date_to_coeditor            ?
_journal_date_from_coeditor          ?
_journal_date_accepted               ?
_journal_date_printers_first         ?
_journal_date_printers_final         ?
_journal_date_proofs_out             ?
_journal_date_proofs_in              ?
_journal_coeditor_name               ?
_journal_coeditor_code               ?
_journal_coeditor_notes
; ?
;
_journal_techeditor_code             ?
_journal_techeditor_notes
; ?
;
_journal_coden_ASTM                  ?
_journal_name_full                   ?
_journal_year                        ?
_journal_volume                      ?
_journal_issue                       ?
_journal_page_first                  ?
_journal_page_last                   ?
_journal_paper_category              ?
_journal_suppl_publ_number           ?
_journal_suppl_publ_pages            ?

#==============================================================================

# 3. TITLE AND AUTHOR LIST

_publ_section_title
; ?
;
_publ_section_title_footnote
; ?
;

# The loop structure below should contain the names and addresses of all
# authors, in the required order of publication. Repeat as necessary.

loop_
	_publ_author_name
        _publ_author_footnote
	_publ_author_address
 ?                                   #<--'Last name, first name'
; ?
;
; ?
;

#==============================================================================

# 4. TEXT

_publ_section_synopsis
;  ?
;
_publ_section_abstract
; ?
;
_publ_section_comment
; ?
;
_publ_section_exptl_prep      # Details of the preparation of the sample(s)
                              # should be given here.
; ?
;
_publ_section_exptl_refinement
; ?
;
_publ_section_references
; ?
;
_publ_section_figure_captions
; ?
;
_publ_section_acknowledgements
; ?
;

#=============================================================================
# 5. OVERALL REFINEMENT & COMPUTING DETAILS

_refine_special_details
; ?
;
_pd_proc_ls_special_details
; ?
;

# The following items are used to identify the programs used.
_computing_molecular_graphics     ?
_computing_publication_material   ?

_refine_ls_weighting_scheme       ?
_refine_ls_weighting_details      ?
_refine_ls_hydrogen_treatment     ?
_refine_ls_extinction_method      ?
_refine_ls_extinction_coef        ?
_refine_ls_number_constraints     ?

_refine_ls_restrained_S_all       ?
_refine_ls_restrained_S_obs       ?

#==============================================================================
# 6. SAMPLE PREPARATION DATA

# (In the unusual case where multiple samples are used in a single
#  Rietveld study, this information should be moved into the phase
#  blocks)

# The following three fields describe the preparation of the material.
# The cooling rate is in K/min.  The pressure at which the sample was
# prepared is in kPa.  The temperature of preparation is in K.

_pd_prep_cool_rate                ?
_pd_prep_pressure                 ?
_pd_prep_temperature              ?

_pd_char_colour                   ?       # use ICDD colour descriptions
data_La4Ga2O9_overall

_refine_ls_shift/su_max                0.08
_refine_ls_shift/su_mean               0.00
_computing_structure_refinement        GSAS
_refine_ls_number_parameters           148
_refine_ls_goodness_of_fit_all         1.46
_refine_ls_number_restraints           0

# Overall powder R-factors

_pd_proc_ls_prof_R_factor              0.0142
_pd_proc_ls_prof_wR_factor             0.0228
_refine_ls_matrix_type                 full

# pointers to the phase blocks
loop_   _pd_phase_block_id
      2004-06-28T18:32|La4Ga2O9_phase1|M.A.G.Aranda||
# pointers to the diffraction patterns
loop_   _pd_block_diffractogram_id
      2004-06-28T18:32|La4Ga2O9_H_01|M.A.G.Aranda|XRLAB
      2004-06-28T18:32|La4Ga2O9_H_02|M.A.G.Aranda|HRPT

# Information for phase 1
data_La4Ga2O9_phase_1

_pd_block_id
  2004-06-28T18:32|La4Ga2O9_phase1|M.A.G.Aranda||

# Histograms for phase 1
loop_   _pd_block_diffractogram_id
  2004-06-28T18:32|La4Ga2O9_H_01|M.A.G.Aranda|XRLAB
  2004-06-28T18:32|La4Ga2O9_H_02|M.A.G.Aranda|HRPT

#==============================================================================
# 7. CHEMICAL, STRUCTURAL AND CRYSTAL DATA

_pd_char_particle_morphology      ?

_chemical_name_systematic
; ?
;
_chemical_name_common             ?
_chemical_formula_moiety          ?
_chemical_formula_structural      ?
_chemical_formula_analytical      ?
_chemical_melting_point           ?
_chemical_compound_source         ?       # for minerals and
                                          # natural products
_symmetry_space_group_name_Hall   ?

_cell_measurement_temperature     ?

_cell_special_details
; ?
;

_geom_special_details             ?

# The following item identifies the program(s) used (if appropriate).
_computing_structure_solution     ?

#==============================================================================

# 8. Phase information from GSAS

_pd_phase_name
    "from C:/Rietveld/Mcarmen/serie_La4Ga2O9/La4Ga2O9/La4ga2o9.exp"
_cell_length_a                         7.97914(12)
_cell_length_b                         11.20536(18)
_cell_length_c                         11.62764(17)
_cell_angle_alpha                      90.0
_cell_angle_beta                       109.4676(8)
_cell_angle_gamma                      90.0
_cell_volume                           980.18201
_symmetry_cell_setting                 monoclinic
_symmetry_space_group_name_H-M         "P 1 21/c 1"
loop_ _symmetry_equiv_pos_site_id _symmetry_equiv_pos_as_xyz
       1 +x,+y,+z 
       2 -x,+y+1/2,-z+1/2 
      -1 -x,-y,-z 
      -2 +x,-y+1/2,+z+1/2 

# ATOMIC COORDINATES AND DISPLACEMENT PARAMETERS


loop_
      _atom_site_type_symbol
      _atom_site_label
      _atom_site_fract_x
      _atom_site_fract_y
      _atom_site_fract_z
      _atom_site_occupancy
      _atom_site_thermal_displace_type
      _atom_site_U_iso_or_equiv
      _atom_site_symmetry_multiplicity
GA      
Ga1     0.2211(5)    0.19121(32)  0.12978(30)  1.0        Uiso   0.0021(9)     4
GA      
Ga2     0.6532(5)    0.18871(34)  0.11786(30)  1.0        Uiso   0.0025(9)     4
LA      
La1     0.5235(4)    0.09917(23)  0.78850(23)  1.0        Uiso   0.0023(8)     4
LA      
La2     0.0260(4)    0.08511(23)  0.80882(23)  1.0        Uiso   0.0037(8)     4
LA      
La3     0.3338(4)    0.12474(28)  0.42768(27)  1.0        Uiso   0.0022(7)     4
LA      
La4     0.8372(4)    0.12331(28)  0.41522(27)  1.0        Uiso   0.0028(8)     4
O       
O1      0.7835(6)    0.2193(5)    0.7480(4)    1.0        Uiso   0.0025(11)    4
O       
O2      0.2361(6)    0.2202(4)    0.7678(4)    1.0        Uiso   0.0050(12)    4
O       
O3      0.2222(7)    0.0356(6)    0.1750(5)    1.0        Uiso   0.0078(13)    4
O       
O4      0.0763(6)    0.2329(5)    0.9786(5)    1.0        Uiso   0.0097(12)    4
O       
O5      0.4332(8)    0.2476(4)    0.1171(5)    1.0        Uiso   0.0059(10)    4
O       
O6      0.6352(7)    0.2295(5)    0.9624(4)    1.0        Uiso   0.0085(12)    4
O       
O7      0.7041(7)    0.0357(6)    0.1749(5)    1.0        Uiso   0.0076(12)    4
O       
O8      0.0720(9)   -0.0004(5)    0.3933(6)    1.0        Uiso   0.0038(10)    4
O       
O9      0.5710(8)    0.0086(5)    0.3978(6)    1.0        Uiso   0.0038(12)    4

loop_ _atom_type_symbol
      _atom_type_number_in_cell
                   GA  8.0        
                   LA 16.0        
                   O  36.0        
 
# If you change Z, be sure to change all 3 of the following
_chemical_formula_sum                  "Ga2 La4 O9"
_chemical_formula_weight               839.07
_cell_formula_units_Z                  4

# MOLECULAR GEOMETRY

loop_
      _geom_bond_atom_site_label_1
      _geom_bond_atom_site_label_2
      _geom_bond_distance
      _geom_bond_site_symmetry_1
      _geom_bond_site_symmetry_2
      _geom_bond_publ_flag
  Ga1       La1               3.432(4)  .     -2_565  N
  Ga1       La3               3.359(5)  .      1_555  N
  Ga1       La3               3.463(4)  .     -2_565  N
  Ga1       O2                1.857(5)  .     -2_565  N
  Ga1       O3                1.821(6)  .      1_555  N
  Ga1       O4                1.814(5)  .      1_554  N
  Ga1       O5                1.857(7)  .      1_555  N
  Ga2       La1               3.468(4)  .     -2_565  N
  Ga2       La3               3.464(5)  .     -2_565  N
  Ga2       La4               3.356(5)  .      1_555  N
  Ga2       O1                1.839(5)  .     -2_565  N
  Ga2       O5                1.872(6)  .      1_555  N
  Ga2       O6                1.824(6)  .      1_554  N
  Ga2       O7                1.835(7)  .      1_555  N
  La1       Ga1               3.432(4)  .     -2_566  N
  La1       Ga2               3.468(4)  .     -2_566  N
  La1       La2               4.058(5)  .      1_555  N
  La1       La2               3.940(5)  .      1_655  N
  La1       La3             3.9676(34)  .      1_555  N
  La1       La3               3.977(4)  .     -1_656  N
  La1       La3               4.014(4)  .     -2_566  N
  La1       La4               3.945(4)  .     -1_656  N
  La1       La4               3.956(4)  .     -2_566  N
  La1       O1                2.643(6)  .      1_555  N
  La1       O2                2.606(6)  .      1_555  N
  La1       O3                2.449(7)  .     -1_656  N
  La1       O5                2.546(5)  .     -2_566  N
  La1       O6                2.411(5)  .      1_555  N
  La1       O7                2.506(6)  .     -1_656  N
  La1       O9                2.373(6)  .     -1_656  N
  La2       La1               3.940(5)  .      1_455  N
  La2       La1               4.058(5)  .      1_555  N
  La2       La3               4.009(4)  .     -1_556  N
  La2       La3               4.031(4)  .     -2_566  N
  La2       La4               3.915(4)  .     -1_656  N
  La2       La4               3.964(4)  .     -2_466  N
  La2       O1                2.365(6)  .      1_455  N
  La2       O2                2.421(6)  .      1_555  N
  La2       O3                2.457(7)  .     -1_556  N
  La2       O4                2.504(6)  .      1_555  N
  La2       O7                2.497(7)  .     -1_656  N
  La2       O8                2.410(7)  .     -1_556  N
  La3       Ga1               3.359(5)  .      1_555  N
  La3       Ga1               3.463(4)  .     -2_566  N
  La3       Ga2               3.464(5)  .     -2_566  N
  La3       La1             3.9676(34)  .      1_555  N
  La3       La1               3.977(4)  .     -1_656  N
  La3       La1               4.014(4)  .     -2_565  N
  La3       La2               4.009(4)  .     -1_556  N
  La3       La2               4.031(4)  .     -2_565  N
  La3       La3               3.835(6)  .     -1_656  N
  La3       La4               3.916(5)  .      1_455  N
  La3       La4               4.067(5)  .      1_555  N
  La3       La4             3.8190(28)  .     -1_656  N
  La3       O2                2.473(6)  .     -2_565  N
  La3       O3                2.946(6)  .      1_555  N
  La3       O4                2.816(6)  .     -2_565  N
  La3       O5                2.523(6)  .     -2_566  N
  La3       O6                2.823(5)  .     -2_565  N
  La3       O8                2.436(7)  .      1_555  N
  La3       O9                2.416(6)  .      1_555  N
  La3       O9                2.430(7)  .     -1_656  N
  La4       Ga2               3.356(5)  .      1_555  N
  La4       La1               3.945(4)  .     -1_656  N
  La4       La1               3.956(4)  .     -2_565  N
  La4       La2               3.915(4)  .     -1_656  N
  La4       La2               3.964(4)  .     -2_665  N
  La4       La3               4.067(5)  .      1_555  N
  La4       La3               3.916(5)  .      1_655  N
  La4       La3             3.8190(28)  .     -1_656  N
  La4       La4               3.855(6)  .     -1_756  N
  La4       O1                2.553(6)  .     -2_565  N
  La4       O4                2.417(6)  .     -2_665  N
  La4       O6                2.492(7)  .     -2_565  N
  La4       O7                2.814(6)  .      1_555  N
  La4       O8                2.412(7)  .      1_655  N
  La4       O8                2.511(7)  .     -1_656  N
  La4       O9                2.432(7)  .      1_555  N
  O1        Ga2               1.839(5)  .     -2_566  N
  O1        La1               2.643(6)  .      1_555  N
  O1        La2               2.365(6)  .      1_655  N
  O1        La4               2.553(6)  .     -2_566  N
  O2        Ga1               1.857(5)  .     -2_566  N
  O2        La1               2.606(6)  .      1_555  N
  O2        La2               2.421(6)  .      1_555  N
  O2        La3               2.473(6)  .     -2_566  N
  O3        Ga1               1.821(6)  .      1_555  N
  O3        La1               2.449(7)  .     -1_656  N
  O3        La2               2.457(7)  .     -1_556  N
  O3        La3               2.946(6)  .      1_555  N
  O4        Ga1               1.814(5)  .      1_556  N
  O4        La2               2.504(6)  .      1_555  N
  O4        La3               2.816(6)  .     -2_566  N
  O4        La4               2.417(6)  .     -2_466  N
  O5        Ga1               1.857(7)  .      1_555  N
  O5        Ga2               1.872(6)  .      1_555  N
  O5        La1               2.546(5)  .     -2_565  N
  O5        La3               2.523(6)  .     -2_565  N
  O6        Ga2               1.824(6)  .      1_556  N
  O6        La1               2.411(5)  .      1_555  N
  O6        La3               2.823(5)  .     -2_566  N
  O6        La4               2.492(7)  .     -2_566  N
  O7        Ga2               1.835(7)  .      1_555  N
  O7        La1               2.506(6)  .     -1_656  N
  O7        La2               2.497(7)  .     -1_656  N
  O7        La4               2.814(6)  .      1_555  N
  O8        La2               2.410(7)  .     -1_556  N
  O8        La3               2.436(7)  .      1_555  N
  O8        La4               2.412(7)  .      1_455  N
  O8        La4               2.511(7)  .     -1_656  N
  O9        La1               2.373(6)  .     -1_656  N
  O9        La3               2.416(6)  .      1_555  N
  O9        La3               2.430(7)  .     -1_656  N
  O9        La4               2.432(7)  .      1_555  N

loop_
      _geom_angle_atom_site_label_1
      _geom_angle_atom_site_label_2
      _geom_angle_atom_site_label_3
      _geom_angle
      _geom_angle_site_symmetry_1
      _geom_angle_site_symmetry_2
      _geom_angle_site_symmetry_3
      _geom_angle_publ_flag
  O2        Ga1       O3              105.66(27)     -2_565  .      1_555  N
  O2        Ga1       O4              122.45(30)     -2_565  .      1_554  N
  O2        Ga1       O5               95.09(27)     -2_565  .      1_555  N
  O3        Ga1       O4              117.82(30)      1_555  .      1_554  N
  O3        Ga1       O5              115.58(28)      1_555  .      1_555  N
  O4        Ga1       O5               97.98(27)      1_554  .      1_555  N
  O1        Ga2       O5               94.49(27)     -2_565  .      1_555  N
  O1        Ga2       O6              120.75(31)     -2_565  .      1_554  N
  O1        Ga2       O7              103.29(30)     -2_565  .      1_555  N
  O5        Ga2       O6               98.24(27)      1_555  .      1_554  N
  O5        Ga2       O7              115.16(30)      1_555  .      1_555  N
  O6        Ga2       O7              121.83(30)      1_554  .      1_555  N
  O1        La1       O2              115.93(15)      1_555  .      1_555  N
  O1        La1       O3               72.01(20)      1_555  .     -1_656  N
  O1        La1       O5               63.34(18)      1_555  .     -2_566  N
  O1        La1       O6               75.43(19)      1_555  .      1_555  N
  O1        La1       O7              173.52(23)      1_555  .     -1_656  N
  O1        La1       O9               97.26(21)      1_555  .     -1_656  N
  O2        La1       O3              171.63(21)      1_555  .     -1_656  N
  O2        La1       O5               64.26(19)      1_555  .     -2_566  N
  O2        La1       O6               80.22(17)      1_555  .      1_555  N
  O2        La1       O7               70.37(20)      1_555  .     -1_656  N
  O2        La1       O9              100.27(20)      1_555  .     -1_656  N
  O3        La1       O5              123.61(21)     -1_656  .     -2_566  N
  O3        La1       O6              100.06(21)     -1_656  .      1_555  N
  O3        La1       O7              101.78(17)     -1_656  .     -1_656  N
  O3        La1       O9               80.65(20)     -1_656  .     -1_656  N
  O5        La1       O6              100.19(20)     -2_566  .      1_555  N
  O5        La1       O7              120.50(22)     -2_566  .     -1_656  N
  O5        La1       O9               73.03(18)     -2_566  .     -1_656  N
  O6        La1       O7              108.00(21)      1_555  .     -1_656  N
  O6        La1       O9              171.89(25)      1_555  .     -1_656  N
  O7        La1       O9               79.62(22)     -1_656  .     -1_656  N
  O1        La2       O2               95.44(15)      1_455  .      1_555  N
  O1        La2       O3               76.87(21)      1_455  .     -1_556  N
  O1        La2       O4               73.48(17)      1_455  .      1_555  N
  O1        La2       O7              165.09(20)      1_455  .     -1_656  N
  O1        La2       O8               89.51(21)      1_455  .     -1_556  N
  O2        La2       O3              171.14(22)      1_555  .     -1_556  N
  O2        La2       O4               78.60(19)      1_555  .      1_555  N
  O2        La2       O7               73.58(19)      1_555  .     -1_656  N
  O2        La2       O8               94.30(21)      1_555  .     -1_556  N
  O3        La2       O4              103.01(20)     -1_556  .      1_555  N
  O3        La2       O7              113.14(17)     -1_556  .     -1_656  N
  O3        La2       O8               81.38(23)     -1_556  .     -1_556  N
  O4        La2       O7              113.03(20)      1_555  .     -1_656  N
  O4        La2       O8              160.65(23)      1_555  .     -1_556  N
  O7        La2       O8               81.47(21)     -1_656  .     -1_556  N
  O2        La3       O5              100.75(19)     -2_565  .     -2_566  N
  O2        La3       O8              104.06(20)     -2_565  .      1_555  N
  O2        La3       O9              109.63(22)     -2_565  .      1_555  N
  O2        La3       O9              173.02(23)     -2_565  .     -1_656  N
  O5        La3       O8              118.22(23)     -2_566  .      1_555  N
  O5        La3       O9              113.44(23)     -2_566  .      1_555  N
  O5        La3       O9               72.52(18)     -2_566  .     -1_656  N
  O8        La3       O9              109.67(23)      1_555  .      1_555  N
  O8        La3       O9               78.18(23)      1_555  .     -1_656  N
  O9        La3       O9               75.36(24)      1_555  .     -1_656  N
  O1        La4       O4               71.75(17)     -2_565  .     -2_665  N
  O1        La4       O6               75.74(19)     -2_565  .     -2_565  N
  O1        La4       O8              104.81(24)     -2_565  .      1_655  N
  O1        La4       O8              168.47(22)     -2_565  .     -1_656  N
  O1        La4       O9              112.39(22)     -2_565  .      1_555  N
  O4        La4       O6               89.67(19)     -2_665  .     -2_565  N
  O4        La4       O8               81.57(21)     -2_665  .      1_655  N
  O4        La4       O8               97.48(21)     -2_665  .     -1_656  N
  O4        La4       O9              162.98(23)     -2_665  .      1_555  N
  O6        La4       O8              170.46(25)     -2_565  .      1_655  N
  O6        La4       O8              100.64(20)     -2_565  .     -1_656  N
  O6        La4       O9               75.95(17)     -2_565  .      1_555  N
  O8        La4       O8               76.93(27)      1_655  .     -1_656  N
  O8        La4       O9              112.03(21)      1_655  .      1_555  N
  O8        La4       O9               76.70(22)     -1_656  .      1_555  N
  Ga2       O1        La1              99.79(22)     -2_566  .      1_555  N
  Ga2       O1        La2             141.64(26)     -2_566  .      1_655  N
  Ga2       O1        La4              98.33(24)     -2_566  .     -2_566  N
  La1       O1        La2             103.60(21)      1_555  .      1_655  N
  La1       O1        La4              99.12(19)      1_555  .     -2_566  N
  La2       O1        La4             107.35(19)      1_655  .     -2_566  N
  Ga1       O2        La1              99.16(24)     -2_566  .      1_555  N
  Ga1       O2        La2             130.93(25)     -2_566  .      1_555  N
  Ga1       O2        La3             100.80(25)     -2_566  .     -2_566  N
  La1       O2        La2             107.61(20)      1_555  .      1_555  N
  La1       O2        La3             104.42(17)      1_555  .     -2_566  N
  La2       O2        La3             110.89(21)      1_555  .     -2_566  N
  Ga1       O3        La1             124.37(30)      1_555  .     -1_656  N
  Ga1       O3        La2             128.53(32)      1_555  .     -1_556  N
  La1       O3        La2             106.84(25)     -1_656  .     -1_556  N
  Ga1       O4        La2             118.46(29)      1_556  .      1_555  N
  Ga1       O4        La4             130.57(30)      1_556  .     -2_466  N
  La2       O4        La4             107.32(20)      1_555  .     -2_466  N
  Ga1       O5        Ga2             139.22(25)      1_555  .      1_555  N
  Ga1       O5        La1             101.26(26)      1_555  .     -2_565  N
  Ga1       O5        La3             103.44(26)      1_555  .     -2_565  N
  Ga2       O5        La1             102.33(27)      1_555  .     -2_565  N
  Ga2       O5        La3             103.02(27)      1_555  .     -2_565  N
  La1       O5        La3             103.03(17)     -2_565  .     -2_565  N
  Ga2       O6        La1             124.39(30)      1_556  .      1_555  N
  Ga2       O6        La4             122.75(27)      1_556  .     -2_566  N
  La1       O6        La4             107.57(21)      1_555  .     -2_566  N
  Ga2       O7        La1             122.65(29)      1_555  .     -1_656  N
  Ga2       O7        La2             127.98(28)      1_555  .     -1_656  N
  La1       O7        La2             108.42(26)     -1_656  .     -1_656  N
  La2       O8        La3             111.63(30)     -1_556  .      1_555  N
  La2       O8        La4             108.56(28)     -1_556  .      1_455  N
  La2       O8        La4             123.55(22)     -1_556  .     -1_656  N
  La3       O8        La4             107.80(20)      1_555  .      1_455  N
  La3       O8        La4             101.07(26)      1_555  .     -1_656  N
  La4       O8        La4             103.07(27)      1_455  .     -1_656  N
  La1       O9        La3             112.30(27)     -1_656  .      1_555  N
  La1       O9        La3             111.41(22)     -1_656  .     -1_656  N
  La1       O9        La4             110.39(27)     -1_656  .      1_555  N
  La3       O9        La3             104.64(24)      1_555  .     -1_656  N
  La3       O9        La4             114.07(22)      1_555  .      1_555  N
  La3       O9        La4             103.54(26)     -1_656  .      1_555  N

# Powder diffraction data for histogram  1
data_La4Ga2O9_p_01

_pd_block_id
  2004-06-28T18:32|La4Ga2O9_H_01|M.A.G.Aranda|XRLAB
#==============================================================================
# 9. INSTRUMENT CHARACTERIZATION

_exptl_special_details
; ?
;

# if regions of the data are excluded, the reason(s) are supplied here:
_pd_proc_info_excluded_regions
; ?
;

# The following item is used to identify the equipment used to record
# the powder pattern when the diffractogram was measured at a laboratory
# other than the authors' home institution, e.g. when neutron or synchrotron
# radiation is used.

_pd_instr_location
; ?
;
_pd_calibration_special_details           # description of the method used
                                          # to calibrate the instrument
; ?
;

_diffrn_ambient_temperature       ?
_diffrn_source                    ?
_diffrn_source_target             ?
_diffrn_source_type               ?
_diffrn_measurement_device_type   ?
_diffrn_detector                  ?
_diffrn_detector_type             ?       # make or model of detector

_pd_meas_scan_method              ?       # options are 'step', 'cont',
                                          # 'tof', 'fixed' or
                                          # 'disp' (= dispersive)
_pd_meas_special_details
;  ?
;

# The following two items identify the program(s) used (if appropriate).
_computing_data_collection        ?
_computing_data_reduction         ?

# Describe any processing performed on the data, prior to refinement.
# For example: a manual Lp correction or a precomputed absorption correction
_pd_proc_info_data_reduction      ?

# The following item is used for angular dispersive measurements only.

_diffrn_radiation_monochromator   ?

# The following items are used to define the size of the instrument.
# Not all distances are appropriate for all instrument types.

_pd_instr_dist_src/mono           ?
_pd_instr_dist_mono/spec          ?
_pd_instr_dist_src/spec           ?
_pd_instr_dist_spec/anal          ?
_pd_instr_dist_anal/detc          ?
_pd_instr_dist_spec/detc          ?

# 10. Specimen size and mounting information

# The next three fields give the specimen dimensions in mm.  The equatorial
# plane contains the incident and diffracted beam.

_pd_spec_size_axial               ?       # perpendicular to
                                          # equatorial plane

_pd_spec_size_equat               ?       # parallel to
                                          # scattering vector
                                          # in transmission

_pd_spec_size_thick               ?       # parallel to
                                          # scattering vector
                                          # in reflection

_pd_spec_mounting                         # This field should be
                                          # used to give details of the
                                          # container.
; ?
;

_pd_spec_mount_mode               ?       # options are 'reflection'
                                          # or 'transmission'

_pd_spec_shape                    ?       # options are 'cylinder'
                                          # 'flat_sheet' or 'irregular'

# phase table
loop_     _pd_phase_id
          _pd_phase_block_id
          _pd_phase_mass_%
          _pd_proc_ls_profile_function
          _pd_proc_ls_peak_cutoff
  1  2004-06-28T18:32|La4Ga2O9_phase1|M.A.G.Aranda||
          ?
;
 CW Profile function number 3 with  19 terms
 Pseudovoigt profile coefficients as parameterized in
 P. Thompson, D.E. Cox & J.B. Hastings (1987). J. Appl. Cryst.,20,79-83.
 Asymmetry correction of L.W. Finger, D.E. Cox & A. P. Jephcoat (1994).
 J. Appl. Cryst.,27,892-900.
 #1(GU)   =    0.000 #2(GV)   =    0.000 #3(GW)   =    8.288
 #4(GP)   =    0.000 #5(LX)   =    1.511 #6(LY)   =   13.169
 #7(S/L)  =   0.0509 #8(H/L)  =   0.0350
 #9(trns) =     0.00 #10(shft)=   0.0000
 #11(stec)=     0.00 #12(ptec)=     0.00 #13(sfec)=     0.00
 #14(L11) =    0.000 #15(L22) =    0.000 #16(L33) =    0.000
 #17(L12) =    0.000 #18(L13) =    0.000 #19(L23) =    0.000
 Peak tails are ignored  where the intensity is below 0.0100 times the peak
   Aniso. broadening axis   0.0   1.0   1.0
;
           0.01000

loop_ _atom_type_symbol
      _atom_type_scat_dispersion_real
      _atom_type_scat_dispersion_imag
      _atom_type_scat_Cromer_Mann_a1
      _atom_type_scat_Cromer_Mann_a2
      _atom_type_scat_Cromer_Mann_a3
      _atom_type_scat_Cromer_Mann_a4
      _atom_type_scat_Cromer_Mann_b1
      _atom_type_scat_Cromer_Mann_b2
      _atom_type_scat_Cromer_Mann_b3
      _atom_type_scat_Cromer_Mann_b4
      _atom_type_scat_Cromer_Mann_c
      _atom_type_scat_source
  GA   -1.354    0.777
 15.2354 3.06690 6.70060 0.24120 4.35910 10.7805 2.96230 61.4135 1.71890 
  International_Tables_Vol_C
  LA   -1.720    9.040
 20.5780 2.94817 19.5990 0.24448 11.3727 18.7726 3.28719 133.124 2.14678 
  International_Tables_Vol_C
  O    0.047    0.032
 3.04850 13.2771 2.28680 5.70110 1.54630 0.32390 0.86700 32.9089 0.25080 
  International_Tables_Vol_C
_diffrn_radiation_probe                x-ray
_diffrn_radiation_polarisn_ratio       0.58

loop_
      _diffrn_radiation_wavelength
      _diffrn_radiation_wavelength_wt
      _diffrn_radiation_type
      _diffrn_radiation_wavelength_id
                      1.540598      1.000   K\a~1~  1
                      1.544398      0.450   K\a~2~  2
_pd_proc_ls_prof_R_factor              0.0650
_pd_proc_ls_prof_wR_factor             0.0844
_pd_proc_ls_prof_wR_expected           0.0634
_refine_ls_R_Fsqd_factor               0.03438

_pd_proc_ls_background_function
;   GSAS Background function number 7 with 36 terms.
 Linear interpolation
      1:    199.370     2:    118.576     3:    91.1843     4:    89.3720    
      5:    83.7293     6:    134.158     7:    88.7471     8:    72.4721    
      9:    54.6469    10:    42.9025    11:    47.2046    12:    56.9203    
     13:    45.5346    14:    77.3095    15:    51.9848    16:    49.4809    
     17:    56.4443    18:    46.5489    19:    38.2850    20:    37.0471    
     21:    29.1282    22:    30.6550    23:    28.1082    24:    31.4438    
     25:    30.1034    26:    33.7531    27:    18.8635    28:    31.6941    
     29:    30.6583    30:    22.2622    31:    30.2128    32:    23.6473    
     33:    28.8544    34:    27.1611    35:    27.0169    36:    22.7935    
;

_exptl_absorpt_process_details
;   GSAS Absorption/surface roughness correction: function number 0
 No correction is applied.
;
_exptl_absorpt_correction_T_min        1.00000
_exptl_absorpt_correction_T_max        1.00000
# Extinction correction
_gsas_exptl_extinct_corr_T_min         1.00000
_gsas_exptl_extinct_corr_T_max         1.00000
_pd_proc_info_datetime                 2004-06-28T18:32:17
_pd_calc_method                        "Rietveld Refinement"

#---- raw/calc data loop -----
_pd_meas_2theta_range_min              10.0
_pd_meas_2theta_range_max              0.0
_pd_meas_2theta_range_inc              10.0
_pd_proc_2theta_range_min              9.99
_pd_proc_2theta_range_max              -0.01
_pd_proc_2theta_range_inc              10.0

_reflns_number_observed                1985
_reflns_limit_h_min                    0
_reflns_limit_h_max                    7
_reflns_limit_k_min                    0
_reflns_limit_k_max                    11
_reflns_limit_l_min                    -11
_reflns_limit_l_max                    10
_reflns_d_resolution_high              1.008
_reflns_d_resolution_low               5.603

# Powder diffraction data for histogram  2
data_La4Ga2O9_p_02

_pd_block_id
  2004-06-28T18:32|La4Ga2O9_H_02|M.A.G.Aranda|HRPT
#==============================================================================
# 9. INSTRUMENT CHARACTERIZATION

_exptl_special_details
; ?
;

# if regions of the data are excluded, the reason(s) are supplied here:
_pd_proc_info_excluded_regions
; ?
;

# The following item is used to identify the equipment used to record
# the powder pattern when the diffractogram was measured at a laboratory
# other than the authors' home institution, e.g. when neutron or synchrotron
# radiation is used.

_pd_instr_location
; ?
;
_pd_calibration_special_details           # description of the method used
                                          # to calibrate the instrument
; ?
;

_diffrn_ambient_temperature       ?
_diffrn_source                    ?
_diffrn_source_target             ?
_diffrn_source_type               ?
_diffrn_measurement_device_type   ?
_diffrn_detector                  ?
_diffrn_detector_type             ?       # make or model of detector

_pd_meas_scan_method              ?       # options are 'step', 'cont',
                                          # 'tof', 'fixed' or
                                          # 'disp' (= dispersive)
_pd_meas_special_details
;  ?
;

# The following two items identify the program(s) used (if appropriate).
_computing_data_collection        ?
_computing_data_reduction         ?

# Describe any processing performed on the data, prior to refinement.
# For example: a manual Lp correction or a precomputed absorption correction
_pd_proc_info_data_reduction      ?

# The following item is used for angular dispersive measurements only.

_diffrn_radiation_monochromator   ?

# The following items are used to define the size of the instrument.
# Not all distances are appropriate for all instrument types.

_pd_instr_dist_src/mono           ?
_pd_instr_dist_mono/spec          ?
_pd_instr_dist_src/spec           ?
_pd_instr_dist_spec/anal          ?
_pd_instr_dist_anal/detc          ?
_pd_instr_dist_spec/detc          ?

# 10. Specimen size and mounting information

# The next three fields give the specimen dimensions in mm.  The equatorial
# plane contains the incident and diffracted beam.

_pd_spec_size_axial               ?       # perpendicular to
                                          # equatorial plane

_pd_spec_size_equat               ?       # parallel to
                                          # scattering vector
                                          # in transmission

_pd_spec_size_thick               ?       # parallel to
                                          # scattering vector
                                          # in reflection

_pd_spec_mounting                         # This field should be
                                          # used to give details of the
                                          # container.
; ?
;

_pd_spec_mount_mode               ?       # options are 'reflection'
                                          # or 'transmission'

_pd_spec_shape                    ?       # options are 'cylinder'
                                          # 'flat_sheet' or 'irregular'

# phase table
loop_     _pd_phase_id
          _pd_phase_block_id
          _pd_phase_mass_%
          _pd_proc_ls_profile_function
          _pd_proc_ls_peak_cutoff
  1  2004-06-28T18:32|La4Ga2O9_phase1|M.A.G.Aranda||
          ?
;
 CW Profile function number 2 with  18 terms
 Profile coefficients for Simpson's rule integration of pseudovoigt function
 C.J. Howard (1982). J. Appl. Cryst.,15,615-620.
 P. Thompson, D.E. Cox & J.B. Hastings (1987). J. Appl. Cryst.,20,79-83.
 #1(GU)   =  222.109 #2(GV)   = -663.599 #3(GW)   =  658.843
 #4(LX)   =    0.000 #5(LY)   =   14.973 #6(trns) =    0.000
 #7(asym) =   1.2984 #8(shft) =   0.0000 #9(GP)   =    0.000
 #10(stec)=     0.00 #11(ptec)=     0.00 #12(sfec)=     0.00
 #13(L11) =    0.000 #14(L22) =    0.000 #15(L33) =    0.000
 #16(L12) =    0.000 #17(L13) =    0.000 #18(L23) =    0.000
 Peak tails are ignored  where the intensity is below 0.0050 times the peak
   Aniso. broadening axis   0.0   1.0   1.0
;
           0.00500

loop_ _atom_type_symbol
      _atom_type_scat_length_neutron
      _atom_type_scat_source
  GA   0.7288
  International_Tables_Vol_C
  LA   0.8240
  International_Tables_Vol_C
  O   0.5803
  International_Tables_Vol_C
_diffrn_radiation_probe                neutron
_diffrn_radiation_wavelength           1.885655
_pd_proc_ls_prof_R_factor              0.0120
_pd_proc_ls_prof_wR_factor             0.0155
_pd_proc_ls_prof_wR_expected           0.0096
_refine_ls_R_Fsqd_factor               0.01136

_pd_proc_ls_background_function
;   GSAS Background function number 7 with 36 terms.
 Linear interpolation
      1:    8799.93     2:    8411.88     3:    8438.67     4:    8258.86    
      5:    8253.44     6:    8476.24     7:    8340.02     8:    7979.75    
      9:    8068.09    10:    8165.33    11:    8255.76    12:    8307.04    
     13:    8055.81    14:    7724.24    15:    7598.29    16:    7593.46    
     17:    7504.45    18:    7384.08    19:    7414.10    20:    7182.37    
     21:    7227.39    22:    7173.91    23:    6926.88    24:    6747.13    
     25:    6876.55    26:    6720.56    27:    6582.45    28:    6547.99    
     29:    6414.85    30:    6325.91    31:    6259.32    32:    6348.28    
     33:    6098.56    34:    6107.77    35:    6005.54    36:    6238.62    
;

_exptl_absorpt_process_details
;   GSAS Absorption/surface roughness correction: function number 0
 No correction is applied.
;
_exptl_absorpt_correction_T_min        1.00000
_exptl_absorpt_correction_T_max        1.00000
# Extinction correction
_gsas_exptl_extinct_corr_T_min         1.00000
_gsas_exptl_extinct_corr_T_max         1.00000
_pd_proc_info_datetime                 2004-06-28T18:32:17
_pd_calc_method                        "Rietveld Refinement"

#---- raw/calc data loop -----
_pd_meas_2theta_range_min              4.0
_pd_meas_2theta_range_max              0.0
_pd_meas_2theta_range_inc              4.0
_pd_proc_2theta_range_min              4.01
_pd_proc_2theta_range_max              0.01
_pd_proc_2theta_range_inc              4.0

_reflns_number_observed                1190
_reflns_limit_h_min                    0
_reflns_limit_h_max                    8
_reflns_limit_k_min                    0
_reflns_limit_k_max                    11
_reflns_limit_l_min                    -12
_reflns_limit_l_max                    11
_reflns_d_resolution_high              0.952
_reflns_d_resolution_low               7.836
#--eof--eof--eof--eof--eof--eof--eof--eof--eof--eof--eof--eof--eof--eof--eof--#
